# Supplementary material for: Localized primary gastrointestinal diffuse large B cell lymphoma received a surgical approach: an analysis of prognostic factors and comparison of staging systems in 101 patients from a single institution
Source: Springer Nature journal article supplement (doi:10.1186/s12957-015-0668-5), 2015-08-13
Supplement: MOESM1 [file 9764936]

**Additional file 1: Table S1** Clinical characteristics and survival rate of patients with localized PG-DLBCL

|                                            | <b>Surgery (n=101)</b> | <b>Chemotherapy (n=49)</b> | <b>P value</b> |
|--------------------------------------------|------------------------|----------------------------|----------------|
| <b>Age &gt;60 yrs (%)</b>                  | 40 (39.6%)             | 17 (34.7%)                 | 0.561          |
| <b>IPI 3-5 (%)</b>                         | 17 (16.8%)             | 7 (14.3%)                  | 0.690          |
| <b>Abnormal LDH (%)</b>                    | 24 (23.8%)             | 13 (26.5%)                 | 0.712          |
| <b>Abnormal <math>\beta</math>2-MG (%)</b> | 51 (50.5%)             | 30 (61.2%)                 | 0.216          |
| <b>Rituximab treatment (%)</b>             | 60 (59.4%)             | 37 (75.5%)                 | 0.053          |
| <b>5-yr RFS</b>                            | 83.1% $\pm$ 4.3%       | 71.6% $\pm$ 9.2%           | 0.260          |
| <b>5-yr OS</b>                             | 83.3% $\pm$ 4.5%       | 71.1% $\pm$ 9.6%           | 0.524          |

**Abbreviations:**

PG-DLBCL: primary gastrointestinal diffuse large B-cell lymphoma; IPI: International Prognostic Index; LDH: lactate dehydrogenase;  $\beta$ 2-MG:  $\beta$ 2-microglobulin; RFS: relapse-free survival; OS: overall survival
